# Supplementary material
Source: Springer Nature journal article supplement (https://www.springerprofessional.de/resource/supplementary/13638_2011_28_MOESM6_ESM.pdf/11897314)

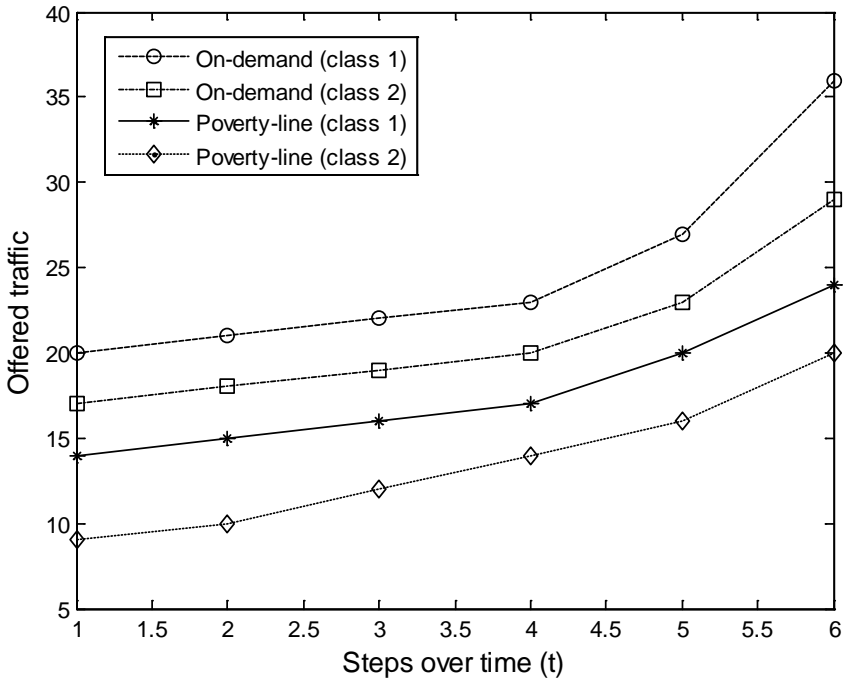

Supplement: MOESM6 [file 11897314]
